# Supplementary material
Source: PubMed Central journal article supplement (PMC4458712)

Table S3. Complete list of the differentially expressed proteins in SILAC experiments

Table S3-1. Summary of upregulated proteins after HOTAIR knockdown

\*superscript denotes the reference number

| Accession   | Gene name | Protein                                                                                      | Ratio (siHOTAIR/siNC) | HOTAIR Knockdown                    |                                       |                                      | HOTAIR Overexpression             |                                          |
|-------------|-----------|----------------------------------------------------------------------------------------------|-----------------------|-------------------------------------|---------------------------------------|--------------------------------------|-----------------------------------|------------------------------------------|
|             |           |                                                                                              |                       | Panc1 (siHOTAIR/siNC) <sup>61</sup> | GIST-T1 (siHOTAIR/siNC) <sup>62</sup> | SBC-3 (siHOTAIR/siGFP) <sup>63</sup> | TTFs (HOTAIR KO/WT) <sup>65</sup> | MDA-MB-231 (HOTAIR/vector) <sup>64</sup> |
| IPI00396378 | HNRNP2B1  | Isoform B1 of Heterogeneous nuclear ribonucleoproteins A2/B1                                 | 1.46                  |                                     |                                       |                                      |                                   |                                          |
| IPI00848161 | DDX39B    | Isoform 1 of Spliceosome RNA helicase DDX39B                                                 | 1.47                  |                                     |                                       |                                      |                                   |                                          |
| IPI00305692 | TXNL1     | Thioredoxin-like protein 1                                                                   | 1.47                  |                                     |                                       |                                      |                                   |                                          |
| IPI00119912 | HSD17B4   | Peroxisomal multifunctional enzyme type 2                                                    | 1.48                  |                                     |                                       |                                      |                                   |                                          |
| IPI00117617 | DDX5      | Probable ATP-dependent RNA helicase DDX5                                                     | 1.48                  |                                     |                                       |                                      |                                   |                                          |
| IPI0056494  | RPL36AL   | RPL36AL 60S ribosomal protein L36a-like                                                      | 1.48                  |                                     |                                       |                                      |                                   |                                          |
| IPI00302688 | ECHDC1    | ECHDC1 Isoform 1 of Enoyl-CoA hydratase domain-containing protein 1                          | 1.49                  |                                     |                                       |                                      |                                   |                                          |
| IPI00445051 | PURB      | PURB Transcriptional activator protein Pur-beta                                              | 1.49                  |                                     |                                       |                                      | 1.60                              |                                          |
| IPI0027699  | PSMD10    | PSMD10 Uncharacterized protein                                                               | 1.49                  |                                     | 2.12                                  |                                      |                                   |                                          |
| IPI0020793  | NIP7      | NIP7 Isoform 2 of 60S ribosome subunit biogenesis protein NIP7 homolog                       | 1.50                  |                                     |                                       |                                      |                                   |                                          |
| IPI00564786 | TXNRD1    | TXNRD1 Isoform 5 of Thioredoxin reductase 1, cytoplasmic                                     | 1.50                  |                                     |                                       |                                      | 0.60                              |                                          |
| IPI00215888 | SRP72     | SRP72 Signal recognition particle 72 kDa protein                                             | 1.50                  |                                     |                                       |                                      |                                   |                                          |
| IPI0007935  | PDLIM5    | PDLIM5 Isoform 1 of PDZ and LIM domain protein 5                                             | 1.50                  |                                     |                                       |                                      |                                   | 9.44                                     |
| IPI0031564  | GGCT      | GGCT Isoform 1 of Gamma-glutamylcyclotransferase                                             | 1.50                  |                                     |                                       |                                      |                                   |                                          |
| IPI0009904  | PDIA4     | PDIA4 Protein disulfide-isomerase A4                                                         | 1.50                  |                                     |                                       |                                      |                                   |                                          |
| IPI0028091  | ACTR3     | ACTR3 Actin-related protein 3                                                                | 1.51                  |                                     |                                       |                                      |                                   |                                          |
| IPI0295098  | SRPR8     | SRPR8 Signal recognition particle receptor subunit beta                                      | 1.51                  |                                     |                                       |                                      |                                   |                                          |
| IPI0023542  | TMED9     | TMED9 Transmembrane emp24 domain-containing protein 9                                        | 1.51                  |                                     |                                       |                                      |                                   |                                          |
| IPI0012382  | SNRPA     | SNRPA U1 small nuclear ribonucleoprotein A                                                   | 1.51                  |                                     |                                       |                                      |                                   |                                          |
| IPI0220578  | GNAI3     | GNAI3 Guanine nucleotide-binding protein G(k) subunit alpha                                  | 1.52                  |                                     |                                       |                                      | 1.73                              |                                          |
| IPI0748145  | GNAI2     | GNAI2 Isoform 1 of Guanine nucleotide-binding protein G(i) subunit alpha-2                   | 1.52                  |                                     |                                       |                                      |                                   |                                          |
| IPI00470610 | PYCR2     | PYCR2 Pyrroline-5-carboxylate reductase 2                                                    | 1.52                  |                                     |                                       |                                      |                                   |                                          |
| IPI01010145 | RBM12     | RBM12 cDNA FLJ90464 fis, clone NT2RP3002281, highly similar to RNA-binding protein 12        | 1.53                  |                                     |                                       |                                      |                                   |                                          |
| IPI01011421 | DL2       | DL2 Dihydropyridinase                                                                        | 1.53                  |                                     |                                       |                                      |                                   |                                          |
| IPI00003327 | ARL3      | ARL3 ADP-ribosylation factor-like protein 3                                                  | 1.53                  |                                     |                                       |                                      |                                   |                                          |
| IPI00005198 | ILF2      | ILF2 Interleukin enhancer-binding factor 2                                                   | 1.54                  |                                     |                                       |                                      |                                   |                                          |
| IPI00759596 | HNRNPC    | HNRNPC Isoform 4 of Heterogeneous nuclear ribonucleoproteins C1/C2                           | 1.54                  |                                     |                                       |                                      |                                   |                                          |
| IPI00440493 | ATP5A1    | ATP5A1 ATP synthase subunit alpha, mitochondrial                                             | 1.55                  |                                     |                                       |                                      |                                   |                                          |
| IPI00791136 | IKBIP     | IKBIP Isoform 1 of Inhibitor of nuclear factor kappa-B kinase-interacting protein            | 1.55                  |                                     |                                       |                                      |                                   |                                          |
| IPI00291643 | SPRYD4    | SPRYD4 SPRY domain-containing protein 4                                                      | 1.56                  |                                     |                                       |                                      |                                   |                                          |
| IPI0015947  | DNAJB1    | DNAJB1 DnaJ homolog subfamily B member 1                                                     | 1.56                  |                                     |                                       |                                      |                                   |                                          |
| IPI00303722 | FAM136A   | FAM136A Protein FAM136A                                                                      | 1.56                  |                                     |                                       |                                      |                                   |                                          |
| IPI00011159 | GCN1L1    | GCN1L1 Translational activator GCN1                                                          | 1.56                  |                                     |                                       |                                      |                                   |                                          |
| IPI00218547 | ALDH18A1  | ALDH18A1 Isoform Short of Delta-1-pyrroline-5-carboxylate synthase                           | 1.58                  |                                     | 2.23                                  |                                      | 0.65                              |                                          |
| IPI00294158 | BLVRA     | BLVRA Biliverdin reductase A                                                                 | 1.58                  |                                     |                                       |                                      |                                   |                                          |
| IPI00012268 | PSMD2     | PSMD2 26S proteasome non-ATPase regulatory subunit 2                                         | 1.59                  |                                     |                                       |                                      |                                   |                                          |
| IPI01012012 | GALNT2    | GALNT2 61 kDa protein                                                                        | 1.59                  |                                     |                                       |                                      |                                   |                                          |
| IPI00300074 | FARSB     | FARSB Phenylalanyl-tRNA synthetase beta chain                                                | 1.59                  |                                     |                                       |                                      |                                   | 1.84                                     |
| IPI00298961 | XPO1      | XPO1 Exportin-1                                                                              | 1.60                  |                                     | 2.11                                  |                                      | 1.66                              |                                          |
| IPI00306290 | XPOT      | XPOT Exportin-T                                                                              | 1.61                  |                                     | 6.88                                  |                                      |                                   |                                          |
| IPI00396203 | TBCD      | TBCD Isoform 1 of Tubulin-specific chaperone D                                               | 1.61                  |                                     |                                       |                                      |                                   |                                          |
| IPI00014230 | C1QBP     | C1QBP Complement component 1 Q subcomponent-binding protein, mitochondrial                   | 1.61                  |                                     |                                       |                                      |                                   |                                          |
| IPI0010779  | TPM4      | TPM4 Isoform 1 of Tropomyosin alpha-4 chain                                                  | 1.62                  |                                     |                                       |                                      |                                   |                                          |
| IPI00011107 | IDH2      | IDH2 Isocitrate dehydrogenase [NADP], mitochondrial                                          | 1.63                  |                                     |                                       |                                      |                                   |                                          |
| IPI00645898 | XPNPEP1   | XPNPEP1 X-prolyl aminopeptidase (Aminopeptidase P) 1, soluble                                | 1.64                  |                                     |                                       |                                      | 0.67                              |                                          |
| IPI00031655 | VPS25     | VPS25 Vacuolar protein-sorting-associated protein 25                                         | 1.65                  |                                     |                                       |                                      |                                   |                                          |
| IPI00032406 | DNAJA2    | DNAJA2 DnaJ homolog subfamily A member 2                                                     | 1.65                  |                                     |                                       |                                      |                                   |                                          |
| IPI00984662 | DAP3      | DAP3 28S ribosomal protein S29, mitochondrial isoform 3                                      | 1.66                  |                                     |                                       |                                      |                                   | 2.25                                     |
| IPI00916936 | MED20     | MED20 Uncharacterized protein                                                                | 1.66                  |                                     | 2.32                                  |                                      |                                   |                                          |
| IPI00929464 | SRP54     | SRP54 signal recognition particle 54 kDa protein isoform 2                                   | 1.67                  |                                     |                                       |                                      |                                   |                                          |
| IPI00550689 | C22orf28  | C22orf28 tRNA-splicing ligase RtcB homolog                                                   | 1.70                  |                                     |                                       |                                      |                                   |                                          |
| IPI00413611 | TOP1      | TOP1 DNA topoisomerase 1                                                                     | 1.70                  |                                     | 2.37                                  |                                      | 1.67                              |                                          |
| IPI00168262 | GLT25D1   | GLT25D1 Procollagen galactosyltransferase 1                                                  | 1.70                  |                                     |                                       |                                      |                                   |                                          |
| IPI00655650 | RPS26     | RPS26 40S ribosomal protein S26                                                              | 1.71                  |                                     |                                       |                                      |                                   |                                          |
| IPI00418471 | VIM       | VIM Vimentin                                                                                 | 1.71                  |                                     |                                       |                                      |                                   |                                          |
| IPI00031570 | NTPCR     | NTPCR Cancer-related nucleoside-triphosphatase                                               | 1.73                  |                                     |                                       |                                      |                                   |                                          |
| IPI00795318 | MCM4      | MCM4 cDNA FLJ54365, highly similar to DNA replication licensing factor MCM4                  | 1.74                  |                                     |                                       |                                      |                                   |                                          |
| IPI01014223 | PTPN1     | PTPN1 cDNA FLJ50851, highly similar to Tyrosine-protein phosphatase non-receptor type 1      | 1.74                  |                                     |                                       |                                      |                                   |                                          |
| IPI00299095 | SNX2      | SNX2 Sorting nexin-2                                                                         | 1.75                  |                                     |                                       |                                      |                                   |                                          |
| IPI00550243 | THUMP1    | THUMP1 THUMP domain-containing protein 1                                                     | 1.76                  |                                     | 3.04                                  |                                      |                                   |                                          |
| IPI00026230 | HNRNPH2   | HNRNPH2 Heterogeneous nuclear ribonucleoprotein H2                                           | 1.78                  |                                     |                                       |                                      | 1.67                              |                                          |
| IPI00884341 | DIAPH1    | DIAPH1 Isoform 2 of Protein diaphanous homolog 1                                             | 1.79                  |                                     |                                       |                                      |                                   | 1.62                                     |
| IPI00936002 | ALDH7A1   | ALDH7A1 Isoform 2 of Alpha-aminoacidic semialdehyde dehydrogenase                            | 1.79                  |                                     |                                       |                                      |                                   |                                          |
| IPI00106642 | SDF2L1    | SDF2L1 Dihydropyrimidinase-like 2                                                            | 1.79                  |                                     |                                       |                                      |                                   |                                          |
| IPI00004833 | RPS5      | RPS5 40S ribosomal protein S5                                                                | 1.79                  |                                     |                                       |                                      |                                   |                                          |
| IPI00027851 | HEXA      | HEXA cDNA FLJ53927, highly similar to Beta-hexosaminidase alpha chain                        | 1.80                  |                                     |                                       |                                      |                                   |                                          |
| IPI00553204 | MOSPD1    | MOSPD1 Isoform 2 of Motile sperm domain-containing protein 1                                 | 1.80                  |                                     |                                       |                                      |                                   |                                          |
| IPI0015842  | RCN1      | RCN1 Reticulocalbin-1                                                                        | 1.81                  |                                     |                                       |                                      |                                   |                                          |
| IPI00465294 | CDC5L     | CDC5L Cell division cycle 5-like protein                                                     | 1.82                  |                                     |                                       |                                      |                                   |                                          |
| IPI00179953 | NASP      | NASP Isoform 1 of Nuclear autoantigenic sperm protein                                        | 1.82                  |                                     |                                       |                                      |                                   |                                          |
| IPI00553165 | PIN4      | PIN4 Protein (Peptidylprolyl cis/trans isomerase) NIMA-interacting, 4                        | 1.83                  |                                     |                                       |                                      | 1.75                              |                                          |
| IPI0013452  | EPRS      | EPRS Bifunctional aminoacyl-tRNA synthetase                                                  | 1.84                  |                                     |                                       |                                      |                                   |                                          |
| IPI00745335 | GPX4      | GPX4 Isoform Cytoplasmic of Phospholipid hydroperoxide glutathione peroxidase, mitochondrial | 1.84                  |                                     |                                       |                                      |                                   |                                          |
| IPI00182757 | KIAA1967  | KIAA1967 Isoform 1 of Protein KIAA1967                                                       | 1.84                  |                                     |                                       |                                      |                                   | 1.80                                     |
| IPI01013988 | EIF3F     | EIF3F cDNA FLJ52696, highly similar to Eukaryotic translation initiation factor 3 subunit 5  | 1.91                  |                                     |                                       |                                      |                                   |                                          |
| IPI00945855 | PFN2      | PFN2 Uncharacterized protein                                                                 | 1.92                  | 0.59                                | 2.53                                  |                                      |                                   |                                          |
| IPI00013871 | RRM1      | RRM1 Ribonucleoside-diphosphate reductase large subunit                                      | 1.93                  |                                     |                                       |                                      |                                   |                                          |

|             |          |                                                                                                 |       |      |      |           |
|-------------|----------|-------------------------------------------------------------------------------------------------|-------|------|------|-----------|
| IPI0002535  | FKBP2    | FKBP2 Peptidyl-prolyl cis-trans isomerase FKBP2                                                 | 1.95  |      |      |           |
| IPI00043598 | IKBIP    | IKBIP Isoform 4 of Inhibitor of nuclear factor kappa-B kinase-interacting protein               | 1.95  |      |      |           |
| IPI00005045 | ABCF2    | ABCF2 ATP-binding cassette sub-family F member 2                                                | 1.96  |      |      | 2.20      |
| IPI00013195 | MRPL49   | MRPL49 39S ribosomal protein L49, mitochondrial                                                 | 2.00  |      |      |           |
| IPI00386189 | NAA15    | NAA15 Isoform 1 of N-alpha-acetyltransferase 15, NatA auxiliary subunit                         | 2.02  |      | 1.93 |           |
| IPI00017339 | SF3B4    | SF3B4 Splicing factor 3B subunit 4                                                              | 2.03  | 0.42 |      | 1.56      |
| IPI00016373 | RAB13    | RAB13 Ras-related protein Rab-13                                                                | 2.03  |      |      |           |
| IPI00003505 | TRIP13   | TRIP13 Isoform 1 of Pachytene checkpoint protein 2 homolog                                      | 2.10  |      | 1.52 |           |
| IPI00028004 | PSMB3    | PSMB3 Proteasome subunit beta type-3                                                            | 2.13  |      |      |           |
| IPI00011217 | NDUFS4   | NDUFS4 NADH dehydrogenase [ubiquinone] iron-sulfur protein 4, mitochondrial                     | 2.13  |      |      |           |
| IPI00017342 | RHOG     | RHOG Rho-related GTP-binding protein RhoG                                                       | 2.14  |      |      |           |
| IPI00551024 | DAK      | DAK Bifunctional ATP-dependent dihydroxyacetone kinase/FAD-AMP lyase (cyclizing)                | 2.15  |      |      |           |
| IPI00017283 | IARS2    | IARS2 Isoleucyl-tRNA synthetase, mitochondrial                                                  | 2.15  |      |      |           |
| IPI01011577 | ERLIN2   | ERLIN2 Uncharacterized protein                                                                  | 2.15  |      |      | 2.51      |
| IPI00413451 | SERPINB6 | SERPINB6 Serpin B6                                                                              | 2.20  |      |      |           |
| IPI00022018 | DPM1     | DPM1 Dolichol-phosphate mannosyltransferase                                                     | 2.21  |      |      |           |
| IPI00946334 | NDUFS2   | NDUFS2 NADH dehydrogenase [ubiquinone] iron-sulfur protein 2, mitochondrial isoform 2 precursor | 2.25  |      |      | 5.61      |
| IPI00005578 | EHD4     | EHD4 EH domain-containing protein 4                                                             | 2.37  |      |      |           |
| IPI00103415 | STAT5B   | STAT5B Signal transducer and activator of transcription 5B                                      | 2.38  |      |      | 1.60      |
| IPI00029631 | ERH      | ERH Enhancer of rudimentary homolog                                                             | 2.41  |      |      |           |
| IPI00031804 | VDAC3    | VDAC3 Isoform 1 of Voltage-dependent anion-selective channel protein 3                          | 2.41  |      |      |           |
| IPI00000760 | DDAH2    | DDAH2 N(G),N(G)-dimethylarginine dimethylaminohydrolase 2                                       | 2.42  |      |      |           |
| IPI00009946 | TOMM34   | TOMM34 Mitochondrial import receptor subunit TOM34                                              | 2.45  | 1.57 |      |           |
| IPI00004534 | PFAS     | PFAS Phosphoribosylformylglycinamide synthase                                                   | 2.48  |      |      |           |
| IPI00021016 | TSFM     | TSFM Isoform 1 of Elongation factor Ts, mitochondrial                                           | 2.49  |      |      |           |
| IPI00020164 | PTP4A1   | PTP4A1 Protein tyrosine phosphatase type IVA 1                                                  | 2.61  |      | 2.09 | 1.57      |
| IPI00020416 | TPP2     | TPP2 Tripeptidyl-peptidase 2                                                                    | 2.67  |      |      |           |
| IPI01012991 | LUC7L2   | LUC7L2 Isoform 1 of Putative RNA-binding protein Luc7-like 2                                    | 2.67  |      | 1.52 |           |
| IPI00744135 | RRBP1    | RRBP1 Isoform 2 of Ribosome-binding protein 1                                                   | 2.89  |      |      |           |
| IPI00335385 | DCPS     | DCPS Scavenger mRNA-decapping enzyme DcpS                                                       | 2.94  |      |      |           |
| IPI00025974 | CHMP4B   | CHMP4B Charged multivesicular body protein 4b                                                   | 3.03  |      |      |           |
| IPI00025039 | FBL      | FBL rRNA 2'-O-methyltransferase fibrillarin                                                     | 3.20  |      |      |           |
| IPI00334282 | FAM3C    | FAM3C Protein FAM3C                                                                             | 3.37  |      |      | 1.61 1.59 |
| IPI00005160 | ARPC1B   | ARPC1B Actin-related protein 2/3 complex subunit 1B                                             | 3.49  |      |      |           |
| IPI00942092 | ADSL     | ADSL Isoform 1 of Adenylosuccinate lyase                                                        | 3.64  |      |      | 2.19      |
| IPI00011619 | PAPSS1   | PAPSS1 Bifunctional 3'-phosphoadenosine 5'-phosphosulfate synthase 1                            | 4.17  |      | 2.75 |           |
| IPI00216230 | TMPO     | TMPO Lamina-associated polypeptide 2, isoform alpha                                             | 4.84  |      | 2.42 |           |
| IPI00301395 | CPVL     | CPVL Probable serine carboxypeptidase CPVL                                                      | 5.72  |      |      | 0.00      |
| IPI00478854 | ZNF574   | ZNF574 Isoform 1 of Zinc finger protein 574                                                     | 7.72  |      |      |           |
| IPI00470674 | CYB5R1   | CYB5R1 NADH-cytochrome b5 reductase 1                                                           | 7.73  |      |      |           |
| IPI00738655 | POTEJ    | POTEJ POTE ankyrin domain family member J                                                       | 13.20 |      |      |           |

Table S3-2. Summary of downregulated proteins after HOTAIR knockdown

| Accession   | Gene name | Protein                                                                               | Ratio (siHOTAIR/siNC) | HOTAIR Knockdown                    |                                       |                                      | HOTAIR Overexpression             |                                          |                                       |
|-------------|-----------|---------------------------------------------------------------------------------------|-----------------------|-------------------------------------|---------------------------------------|--------------------------------------|-----------------------------------|------------------------------------------|---------------------------------------|
|             |           |                                                                                       |                       | Panc1 (siHOTAIR/siNC) <sup>51</sup> | GIST-T1 (siHOTAIR/siNC) <sup>52</sup> | SBC-3 (siHOTAIR/siGFP) <sup>53</sup> | TTFs (HOTAIR KO/WT) <sup>55</sup> | MDA-MB-231 (HOTAIR/vector) <sup>54</sup> | KYSE180 (HOTAIR/vector) <sup>50</sup> |
| IPI00217963 | KRT16     | KRT16 Keratin, type I cytoskeletal 16                                                 | 0.07                  |                                     |                                       |                                      | 0.00                              |                                          |                                       |
| IPI00220327 | KRT1      | KRT1 Keratin, type II cytoskeletal 1                                                  | 0.14                  |                                     |                                       |                                      | 0.00                              |                                          |                                       |
| IPI00019359 | KRT9      | KRT9 Keratin, type I cytoskeletal 9                                                   | 0.17                  |                                     |                                       |                                      | 0.00                              |                                          |                                       |
| IPI00021304 | KRT2      | KRT2 Keratin, type II cytoskeletal 2 epidermal                                        | 0.18                  |                                     |                                       |                                      | 0.00                              |                                          |                                       |
| IPI00024742 | UQCRCQ    | UQCRCQ Cytochrome b-c1 complex subunit 8                                              | 0.19                  |                                     |                                       |                                      |                                   |                                          |                                       |
| IPI00009865 | KRT10     | KRT10 Keratin, type I cytoskeletal 10                                                 | 0.27                  |                                     |                                       |                                      | 1.95                              |                                          |                                       |
| IPI00165261 | SCFD1     | SCFD1 Sec1 family domain-containing protein 1                                         | 0.28                  |                                     |                                       |                                      | 2.03                              |                                          |                                       |
| IPI00101095 | C20orf27  | C20orf27 Isoform 1 of UPPF0687 protein C20orf27                                       | 0.28                  |                                     |                                       |                                      |                                   | 3.65                                     |                                       |
| IPI00334291 | LONP1     | LONP1 Lon protease homolog                                                            | 0.34                  |                                     |                                       |                                      |                                   |                                          |                                       |
| IPI00019733 | RAE1      | RAE1 mRNA export factor                                                               | 0.35                  |                                     |                                       |                                      |                                   |                                          |                                       |
| IPI00384444 | KRT14     | KRT14 Keratin, type I cytoskeletal 14                                                 | 0.39                  |                                     |                                       |                                      | 0.20                              |                                          |                                       |
| IPI00797038 | PCK2      | PCK2 Isoform 1 of Phosphoenolpyruvate carboxykinase [GTP], mitochondrial              | 0.39                  |                                     | 2.15                                  |                                      | 0.53                              |                                          |                                       |
| IPI00869040 | NUBP1     | NUBP1 Isoform 2 of Cytosolic Fe-S cluster assembly factor NUBP1                       | 0.39                  |                                     |                                       |                                      |                                   |                                          |                                       |
| IPI00412771 | CD2AP     | CD2AP CD2-associated protein                                                          | 0.43                  |                                     |                                       |                                      | 2.04                              |                                          |                                       |
| IPI00953925 | AIP       | AIP Aryl hydrocarbon receptor interacting protein                                     | 0.43                  |                                     |                                       |                                      |                                   |                                          |                                       |
| IPI00472939 | SPCS2     | LOC653566:SPCS2 Signal peptidase complex subunit 2                                    | 0.46                  |                                     |                                       |                                      |                                   |                                          |                                       |
| IPI00008333 | CGA       | CGA Glycoprotein hormones alpha chain                                                 | 0.46                  |                                     |                                       |                                      | 0.00                              |                                          |                                       |
| IPI00983062 | C11orf48  | C11orf48 14 kDa protein                                                               | 0.46                  |                                     |                                       |                                      |                                   |                                          |                                       |
| IPI00927538 | TBL2      | TBL2 Uncharacterized protein                                                          | 0.48                  |                                     |                                       |                                      |                                   |                                          |                                       |
| IPI00306398 | NUDCD1    | NUDCD1 Isoform 2 of NudC domain-containing protein 1                                  | 0.48                  |                                     |                                       |                                      |                                   | 1.97                                     |                                       |
| IPI00016746 | CBFB      | CBFB Isoform 1 of Core-binding factor subunit beta                                    | 0.49                  |                                     |                                       |                                      |                                   |                                          |                                       |
| IPI00009867 | KRT5      | KRT5 Keratin, type II cytoskeletal 5                                                  | 0.49                  |                                     |                                       |                                      |                                   |                                          |                                       |
| IPI00019487 | NUDT15    | NUDT15 Probable 7,8-dihydro-8-oxoguanine triphosphatase NUDT15                        | 0.49                  |                                     |                                       |                                      |                                   |                                          |                                       |
| IPI00005154 | SSRP1     | SSRP1 FACT complex subunit SSRP1                                                      | 0.53                  |                                     |                                       |                                      |                                   |                                          |                                       |
| IPI00006440 | MRPS7     | MRPS7 28S ribosomal protein S7, mitochondrial                                         | 0.54                  |                                     |                                       |                                      |                                   |                                          |                                       |
| IPI00032827 | SF3B14    | SF3B14 Pre-mRNA branch site protein p14                                               | 0.56                  |                                     |                                       |                                      |                                   |                                          |                                       |
| IPI00909766 | PSMD5     | PSMD5 cDNA FLJ52877, highly similar to 26S proteasome non-ATPase regulatory subunit 5 | 0.56                  |                                     | 2.88                                  |                                      |                                   |                                          |                                       |
| IPI00028618 | MGMT      | MGMT methylated-DNA-protein-cysteine methyltransferase                                | 0.57                  |                                     |                                       |                                      |                                   | 1.98                                     |                                       |
| IPI00414836 | OSTF1     | OSTF1 Osteoclast-stimulating factor 1                                                 | 0.57                  |                                     |                                       |                                      |                                   |                                          |                                       |
| IPI01011723 | ARL1      | ARL1 cDNA FLJ51704, highly similar to ADP-ribosylation factor-like protein 1          | 0.57                  |                                     |                                       |                                      |                                   |                                          |                                       |
| IPI00020021 | DEK       | DEK Protein DEK                                                                       | 0.58                  |                                     |                                       |                                      | 2.37                              | 2.25                                     |                                       |
| IPI00027681 | NNMT      | NNMT Nicotinamide N-methyltransferase                                                 | 0.58                  |                                     |                                       |                                      | 0.44                              |                                          |                                       |
| IPI00219301 | MARCKS    | MARCKS Myristoylated alanine-rich C-kinase substrate                                  | 0.58                  |                                     |                                       |                                      |                                   |                                          |                                       |
| IPI00011770 | NDUFA4    | NDUFA4 NADH dehydrogenase [ubiquinone] 1 alpha subcomplex subunit 4                   | 0.58                  |                                     |                                       |                                      |                                   | 2.67                                     |                                       |
| IPI00789806 | LAP3      | LAP3 Isoform 2 of Cytosol aminopeptidase                                              | 0.59                  |                                     |                                       |                                      |                                   |                                          |                                       |
| IPI0033838  | ACOT1     | ACOT1 Acyl-coenzyme A thioesterase 1                                                  | 0.61                  |                                     |                                       |                                      |                                   |                                          |                                       |
| IPI00024524 | PNO1      | PNO1 RNA-binding protein PNO1                                                         | 0.61                  |                                     |                                       |                                      |                                   |                                          |                                       |

|             |         |                                                                          |
|-------------|---------|--------------------------------------------------------------------------|
| IPI00218848 | ATP5I   | ATP5I ATP synthase, H+ transporting, mitochondrial F0 complex, subunit E |
| IPI00002557 | CHD3    | CHD3;LOC732272;SNORA69;COPG2 Coatomer subunit gamma-2                    |
| IPI00927101 | RPSA    | SNORA6;RPSAP15;SNORA62;RPSA Uncharacterized protein                      |
| IPI00016179 | S100A13 | S100A13 Protein S100-A13                                                 |
| IPI00301058 | VASP    | VASP Vasodilator-stimulated phosphoprotein                               |
| IPI00220637 | SARS    | SARS Seryl-tRNA synthetase, cytoplasmic                                  |
| IPI01014729 | NAP1L4  | NAP1L4 Uncharacterized protein                                           |
| IPI00219155 | RPL27   | RPL27 60S ribosomal protein L27                                          |
| IPI00978664 | EIF1AD  | EIF1AD Uncharacterized protein                                           |
| IPI00291939 | SMC1A   | SMC1A Structural maintenance of chromosomes protein 1A                   |
| IPI00017510 | MT-CO2  | MT-CO2 Cytochrome c oxidase subunit 2                                    |
| IPI00643583 | DYNLRB1 | DYNLRB1 Isoform 1 of Dynein light chain roadblock-type 1                 |
| IPI00719611 | GPD2    | GPD2 Isoform 2 of Glycerol-3-phosphate dehydrogenase, mitochondrial      |
| IPI00291328 | NDUFV2  | NDUFV2 NADH dehydrogenase [ubiquinone] flavoprotein 2, mitochondrial     |
| IPI00024920 | ATP5D   | ATP synthase subunit delta, mitochondrial                                |

|      |
|------|
| 0.62 |
| 0.62 |
| 0.63 |
| 0.63 |
| 0.64 |
| 0.64 |
| 0.64 |
| 0.64 |
| 0.65 |
| 0.66 |
| 0.66 |
| 0.66 |
| 0.66 |
| 0.66 |
| 0.66 |
| 0.67 |
| 0.67 |
| 0.67 |

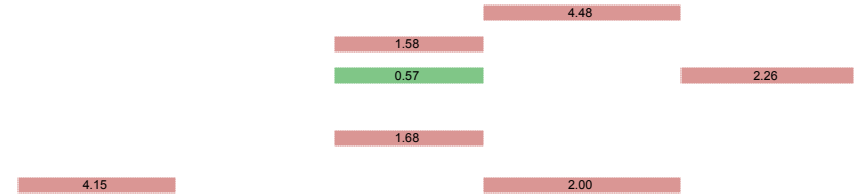

Supplement: supp_M114.043984_mcp.M114.043984-4.pdf [file supp_M114.043984_mcp.M114.043984-4.pdf]
